# Supplementary material
Source: PubMed Central journal article supplement (PMC8966302)
Supplement: NIHMS1666002-supplement-Supplemental_Table_1.pdf [file NIHMS1666002-supplement-Supplemental_Table_1.pdf]

**Supplemental Table 1. Insulin indices assessed from 2-hour oral glucose tolerance test.**

| Insulin indices, median (IQR) | Normal  | TBSA 20-40%         | TBSA ≥ 40%          | P     |
|-------------------------------|---------|---------------------|---------------------|-------|
|                               |         |                     |                     |       |
| QUICKI                        | ≥ 0.357 | 0.350 (0.341-0.373) | 0.340 (0.329-0.375) | 0.370 |
| ISI (composite)               | > 3.0   | 6 (4-9)             | 5 (3-13)            | 0.950 |
| IGI                           | > 0.4   | 0.40 (0.27-0.61)    | 0.47 (0.23-0.68)    | 0.454 |
| HOMA2-IR                      | ≤ 1     | 1.01 (0.65-1.34)    | 1.35 (0.84-1.54)    | 0.141 |
| HOMA2 % β <sup>a</sup>        | 100     | 91 (73-117)         | 80% (65-147)        | 0.909 |
| HOMA2 % S                     | 100     | 100 (75-156)        | 74 (65-120)         | 0.137 |

QUICKI, quantitative insulin sensitivity check index; ISI (composite), composite whole-body insulin sensitivity index; IGI, insulinogenic index; HOMA2-IR, homeostasis model assessment of insulin resistance; β, β-cell function; S, insulin sensitivity <sup>a</sup> Assessed using c-peptide data.
